# Supplementary material for: Direct Synthesis of Polyethylene Thermoplastic Elastomers Using Hybrid Bulky Acenaphthene-Based α-Diimine Ni(II) Catalysts
Source: MDPI journal article supplement (doi:10.3390/molecules28052266), 2023-02-28
Supplement: s1 [file s1]

Supporting Information for:

# Direct Synthesis of Polyethylene Thermoplastic Elastomers Using Hybrid Bulky Acenaphthene-Based $\alpha$ -Diimine Ni(II) Catalysts

Hui Wang <sup>1</sup>, Weiqing Lu <sup>2,3</sup>, Mingmin Zou <sup>3</sup> and Shengyu Dai <sup>2,3,\*</sup>

<sup>1</sup> School of Chemistry and Chemical Engineering, Hefei Normal University, Hefei 230061, China

<sup>2</sup> School of Chemical and Environmental Engineering, Anhui Polytechnic University, Wuhu 241000, China

<sup>3</sup> Information Materials and Intelligent Sensing Laboratory of Anhui Province, Institutes of Physical Science and Information Technology, Anhui University, Hefei 230601, China

\* Correspondence: daiyu@ustc.edu.cn; Tel.: +86-13955189794

## 1. Spectra Data

### 1.1 <sup>1</sup>H NMR of Representative Polyethylene.

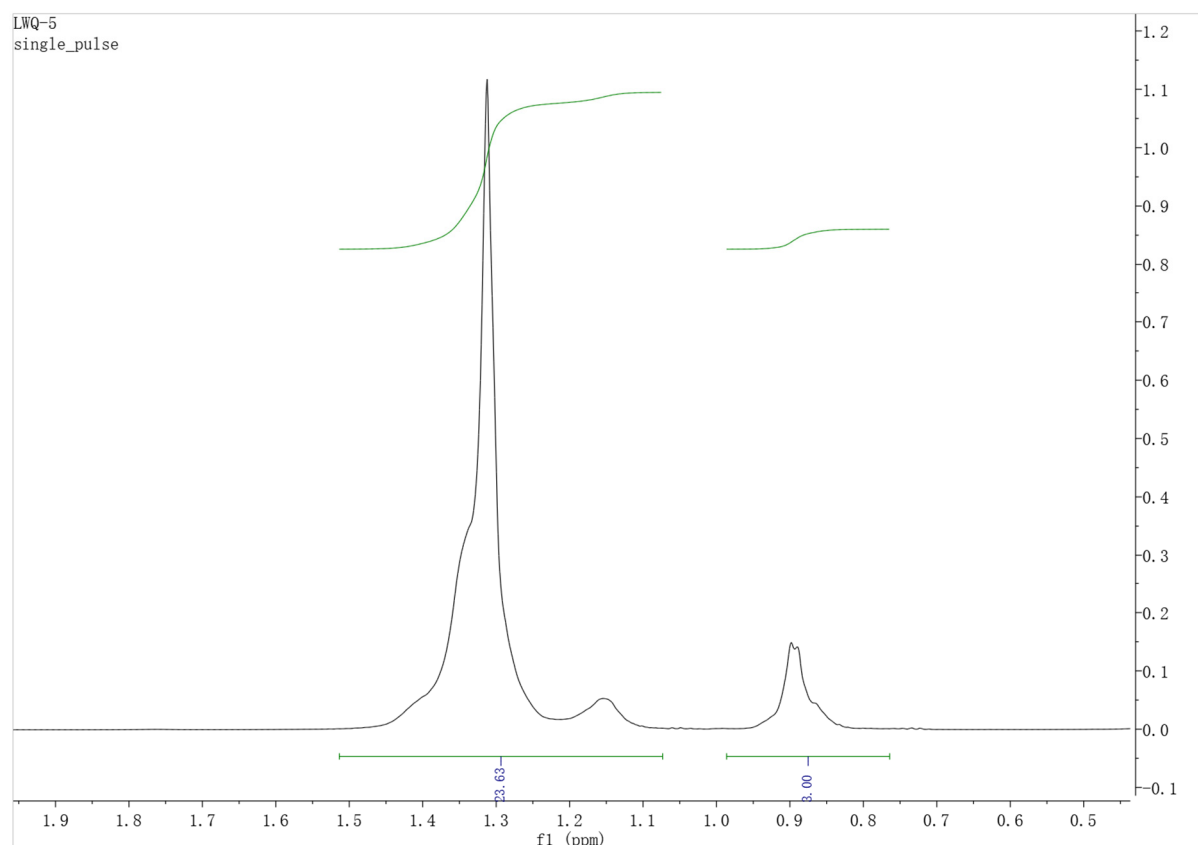

**Figure S1.** <sup>1</sup>H NMR spectrum of the polymer from table 1, entry 4 (d<sup>6</sup>-benzene, 70 °C).

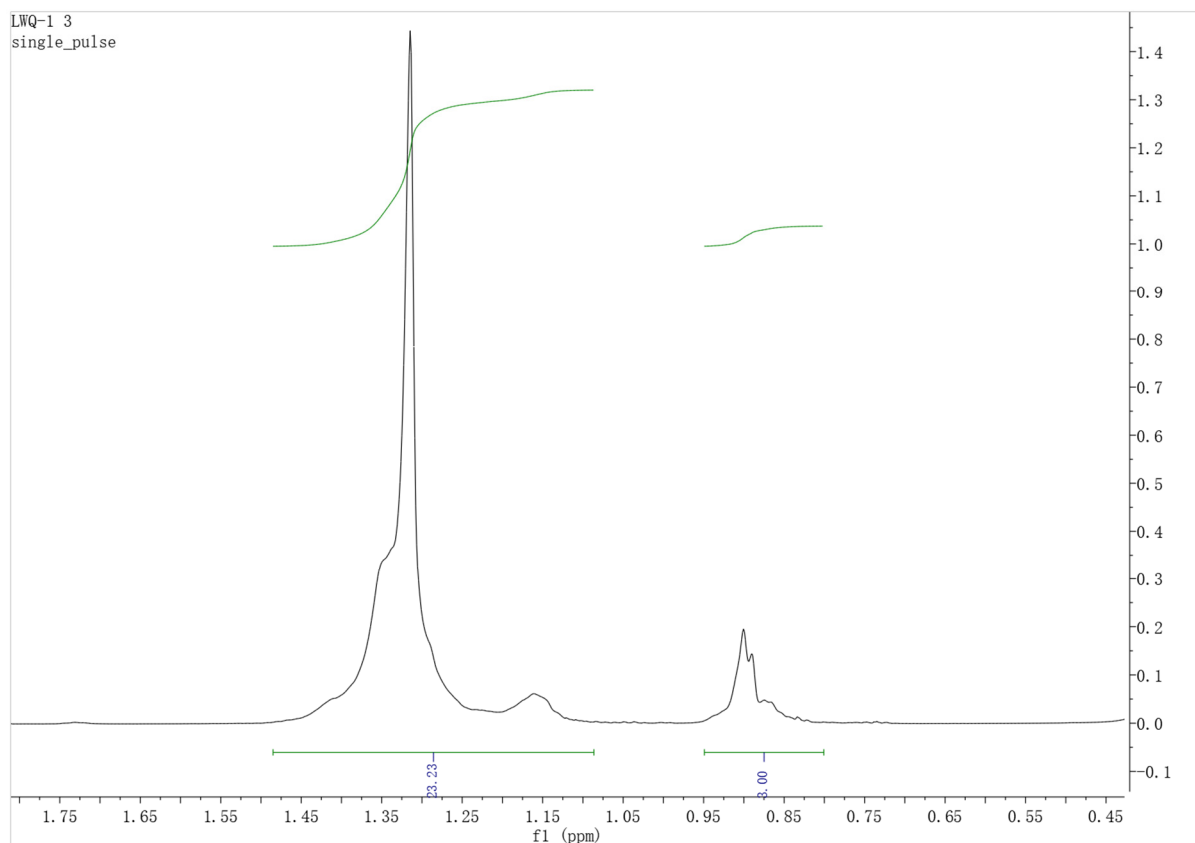

**Figure S2.**  $^1\text{H}$  NMR spectrum of the polymer from table 1, entry 5 ( $\text{d}^6$ -benzene,  $70\text{ }^\circ\text{C}$ ).

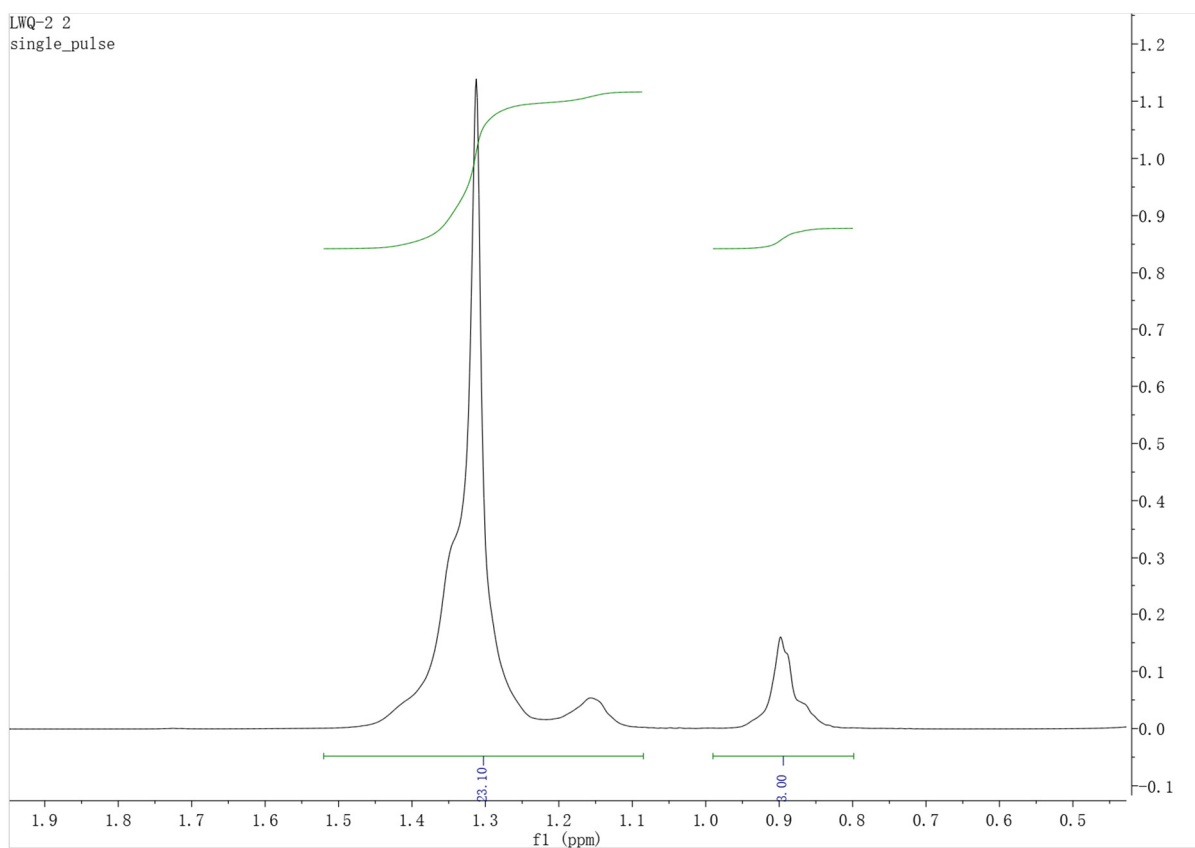

**Figure S3.**  $^1\text{H}$  NMR spectrum of the polymer from table 1, entry 6 ( $\text{d}^6$ -benzene,  $70\text{ }^\circ\text{C}$ ).

## 1.2 DSC and GPC of Representative Polyethylenes.

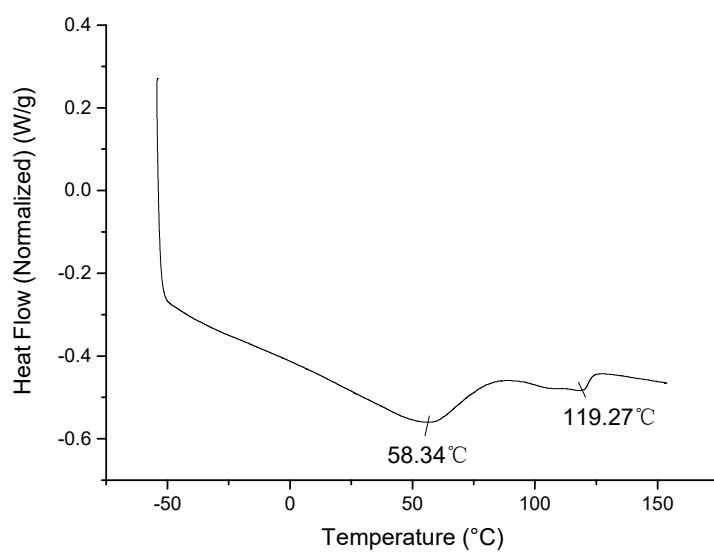

**Figure S4.** DSC of the polymer from table 1, entry 1.

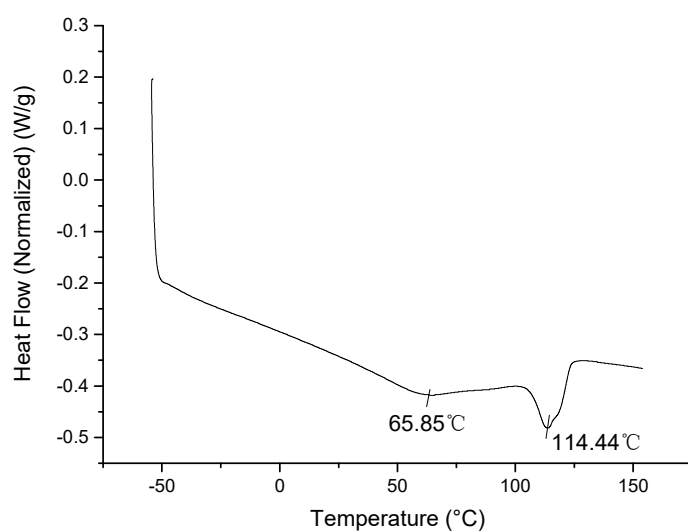

**Figure S5.** DSC of the polymer from table 1, entry 2.

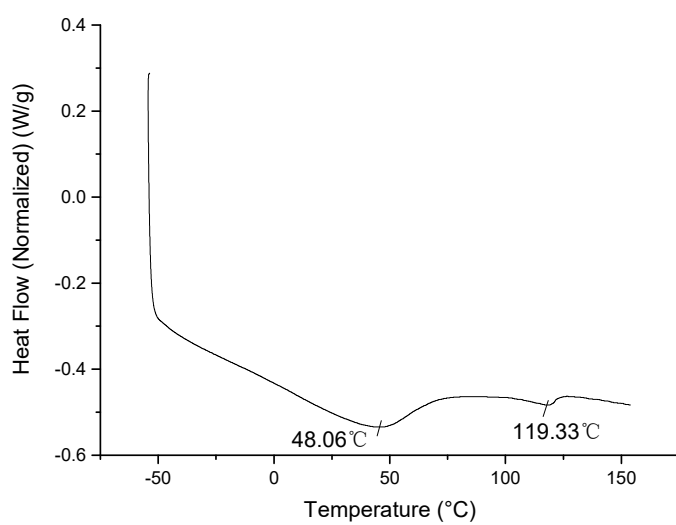

**Figure S6.** DSC of the polymer from table 1, entry 3.

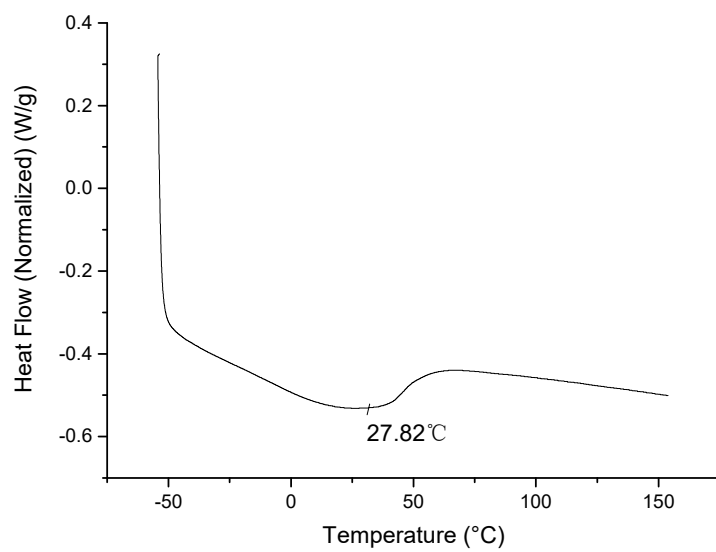

**Figure S7.** DSC of the polymer from table 1, entry 4.

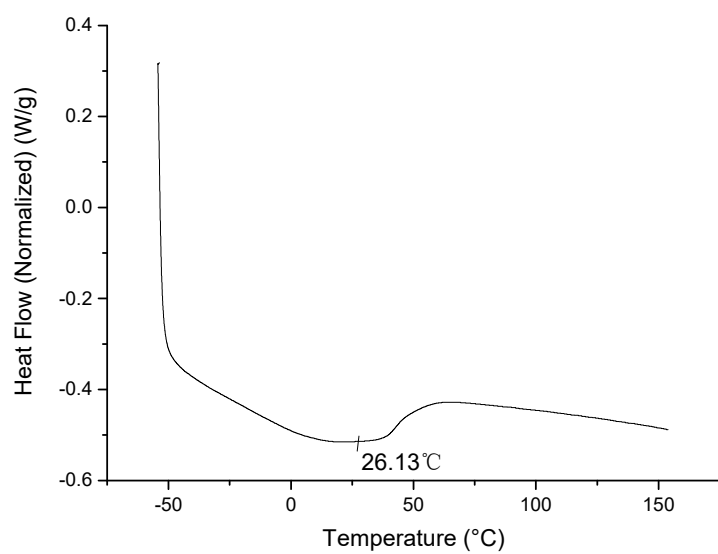

**Figure S8.** DSC of the polymer from table 1, entry 5.

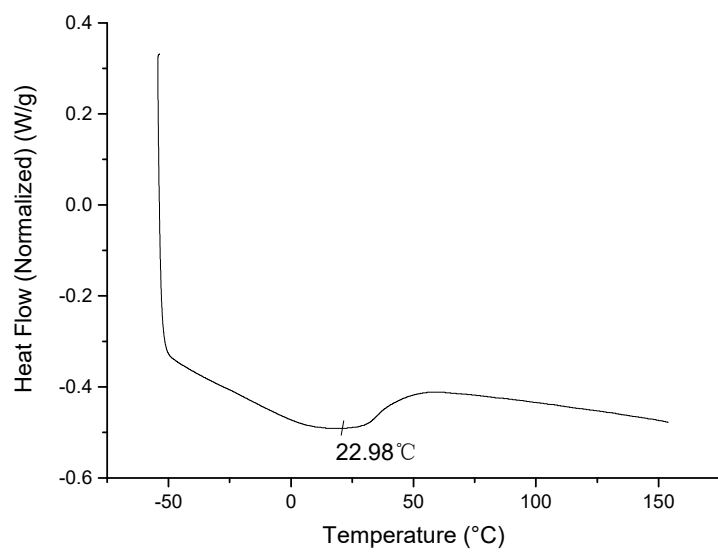

**Figure S9.** DSC of the polymer from table 1, entry 6.

**MW Averages**

|             |               |            |            |
|-------------|---------------|------------|------------|
| Mp: 255739  | Mn: 195932    | Mv: 312451 | Mw: 356133 |
| Mz: 1287861 | Mz+1: 3893975 | PD: 1.8176 |            |

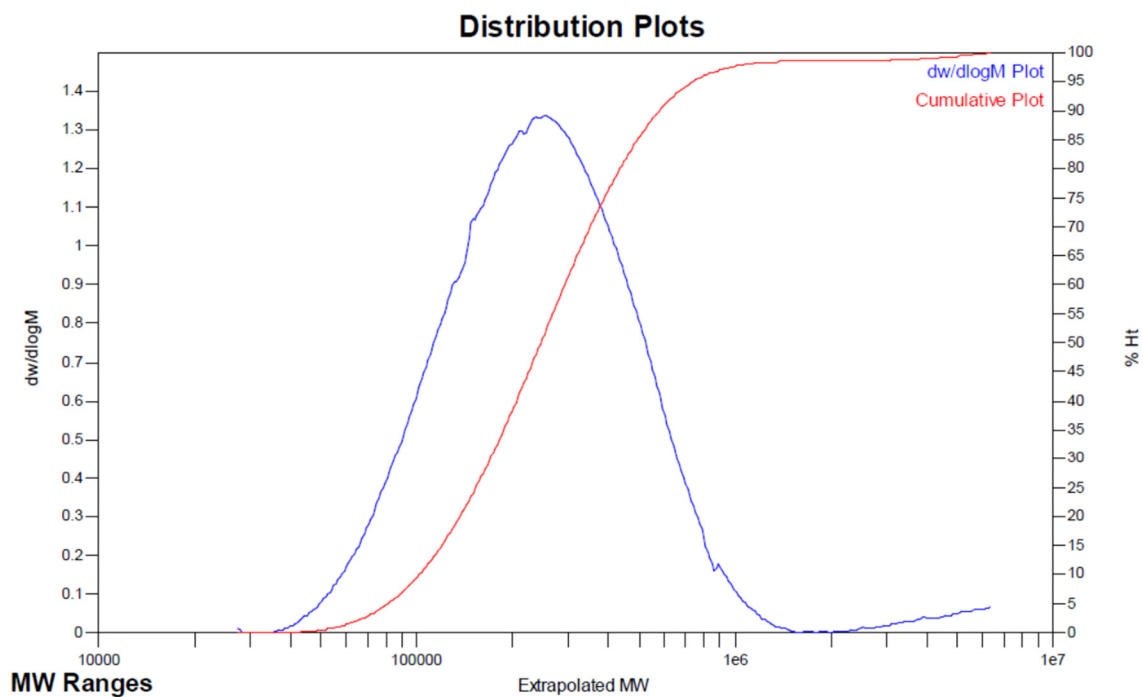

**Figure S10.** GPC of the polymer from table 1, entry 1.

**MW Averages**

|             |               |            |            |
|-------------|---------------|------------|------------|
| Mp: 555004  | Mn: 335343    | Mv: 579452 | Mw: 624788 |
| Mz: 1000112 | Mz+1: 1422377 | PD: 1.8631 |            |

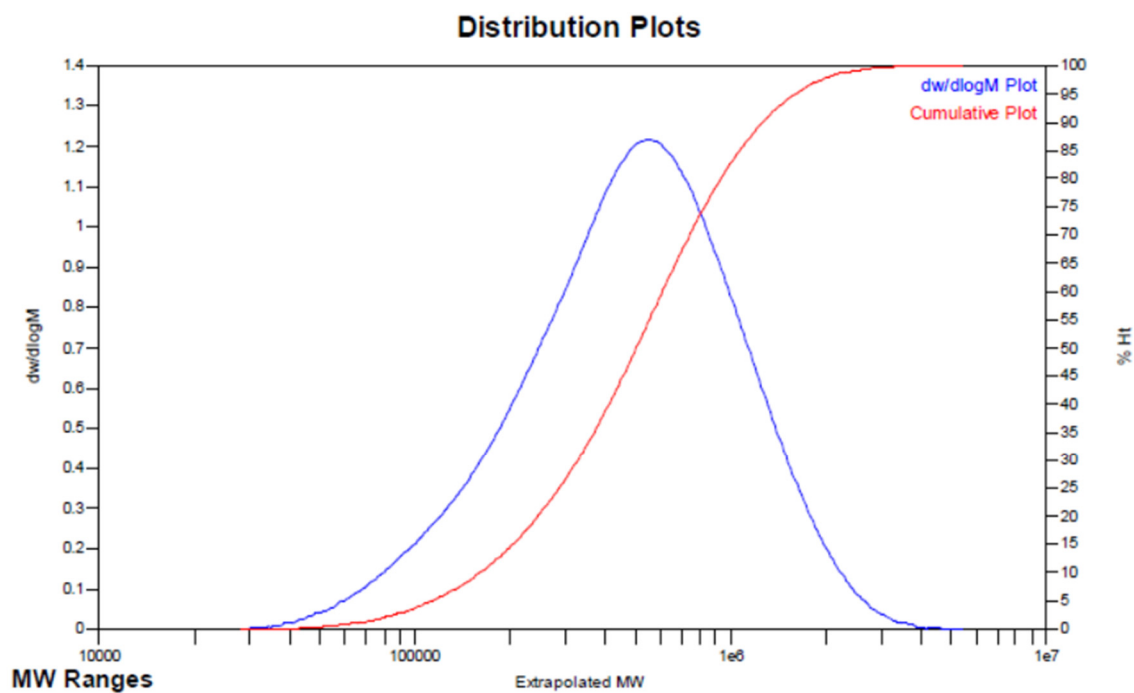

**Figure S11.** GPC of the polymer from table 1, entry 4.

#### MW Averages

Mp: 626661

Mn: 352439

Mv: 642506

Mw: 706062

Mz: 1190872

Mz+1: 1749169

PD: 2.0034

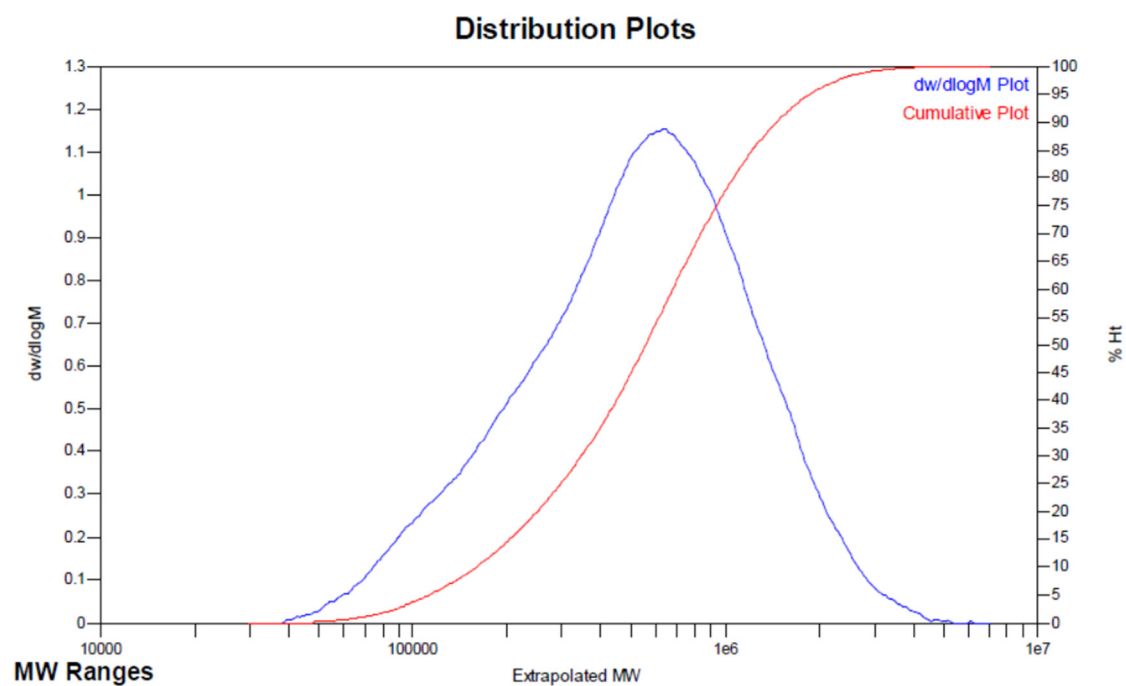

Figure S12. GPC of the polymer from table 1, entry 7.

### 1.3 Infrared Spectra of the Complexes.

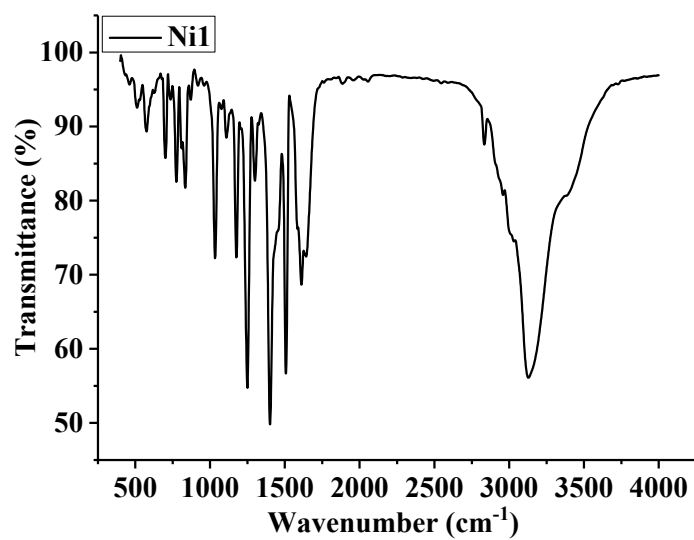

Figure S13. IR of the complex Ni1.

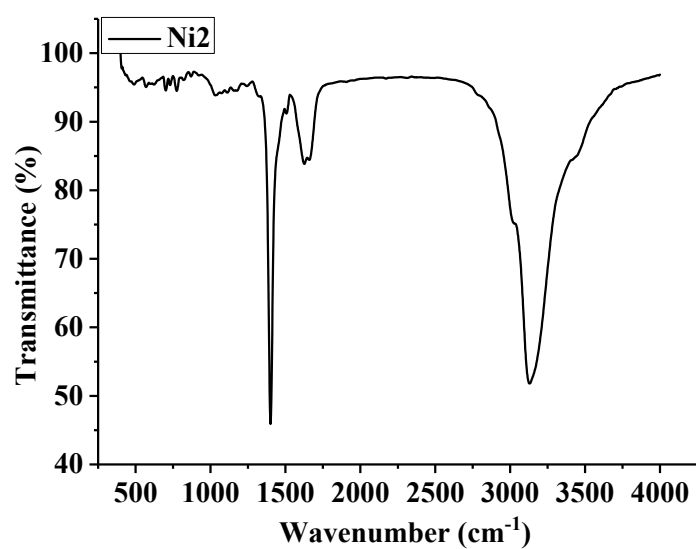

Figure S14. IR of the complex Ni2.

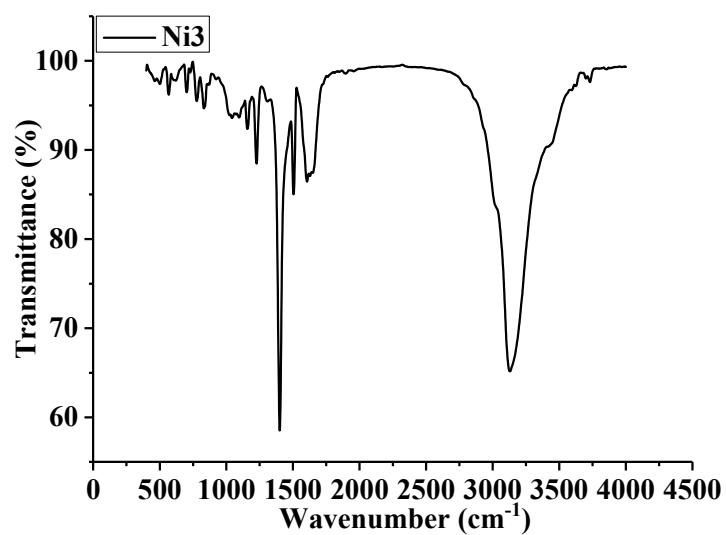

Figure S15. IR of the complex Ni3.

#### 1.4 <sup>13</sup>C NMR of Representative Polyethylene.



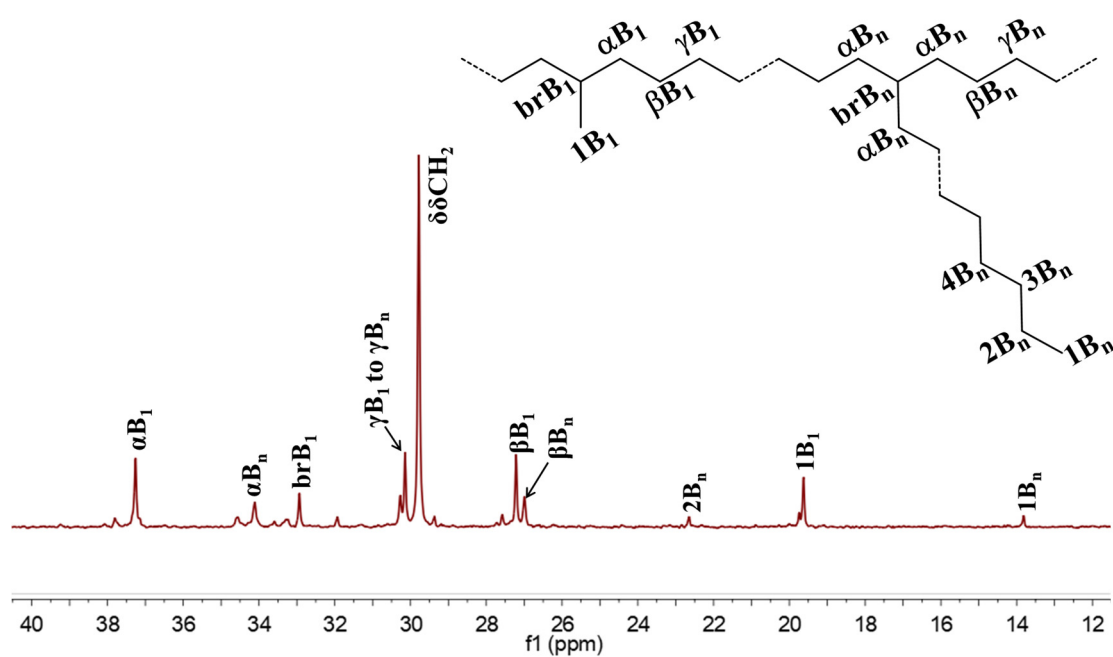

**Figure S16.**  $^{13}\text{C}$  NMR spectrum of the polymer from table 1, entry 7 ( $\text{d}^6$ -benzene,  $70^\circ\text{C}$ ).
